# Supplementary material for: “The Good, The Bad, and the Minimum Tolerable”: Exploring Expectations of Institutional Food
Source: Foods. 2021 Apr 3;10(4):767. doi: 10.3390/foods10040767 (PMC8066764; doi:10.3390/foods10040767)
Supplement: Supplementary file 1 [file foods-10-00767-s001.pdf]

## Supplementary Materials

**Table S1. Interview guide – food-personality**

| <b>Food-related personality trait</b>       | <b>Items</b>                                                                                                                                                                                                                                                                                                   |
|---------------------------------------------|----------------------------------------------------------------------------------------------------------------------------------------------------------------------------------------------------------------------------------------------------------------------------------------------------------------|
| Food Involvement – Bell and Marshall (2003) | <ul style="list-style-type: none"><li>- I don't think much about food each day</li><li>- I enjoy cooking for myself and others</li><li>- Talking about what I ate or am going to eat is something I like to do</li><li>- Compared with other daily decisions, my food choices are not very important</li></ul> |
| Food neophobia - Pliner and Hobden (1992)   | <ul style="list-style-type: none"><li>- I am constantly sampling new and different foods</li><li>- I like food from different countries</li><li>- I don't trust new foods</li><li>- I am afraid to eat things I have never had before</li></ul>                                                                |
| Health consciousness – Gould (1988)         | <ul style="list-style-type: none"><li>- I am very self-conscious about my health</li><li>- I am alert to changes in my health</li><li>- I notice how I feel physically as I go through the day</li></ul>                                                                                                       |

**Table S2. Interview guide – capturing different expectation types**

| <b>Expectation type</b>          | <b>Interview guide<br/>Expectation type basis</b>                                                                                                                                                                                                                                                                                                                                                                                     |
|----------------------------------|---------------------------------------------------------------------------------------------------------------------------------------------------------------------------------------------------------------------------------------------------------------------------------------------------------------------------------------------------------------------------------------------------------------------------------------|
| Ideal                            | In an ideal world, what expectations do you have to the institutional food experience?<br>What do you think it ideally should be like?                                                                                                                                                                                                                                                                                                |
| Should/normative and desired     | What do you think you should be able to expect of institutional food today?<br>What do you desire from the institutional food experience?                                                                                                                                                                                                                                                                                             |
| Predictive                       | What do you realistically expect from the institutional food experience?<br>What do you predict the institutional food will be like?                                                                                                                                                                                                                                                                                                  |
| Minimum tolerable                | What is the least you should be able to expect from institutional food experiences?<br>What are the minimum requirements for you to be satisfied with institutional food?                                                                                                                                                                                                                                                             |
| Worst imaginable and intolerable | Questions were not directly asked about these types; however, expectations of this type surfaced when informants discussed where they got the information t about institutional food, often from media stories and word of mouth.<br>If not addressed by the informants on their own initiative, the interviewer would ask: “What do you think is absolutely intolerable/ worst imaginable about the institutional food experience?”. |
| Deserved                         | Questions were not directly asked about this type, but it appeared during the discussions in relation to the other expectation types.<br>If not addressed by the informants on their own initiative, the interviewer would ask: “What do you think the residents deserve from the institutional food experience?”.                                                                                                                    |
